# Supplementary material
Source: Springer Nature journal article supplement (https://www.springermedizin.de/resource/supplementary/12943_2011_1044_MOESM6_ESM.pdf/9552212)

**A**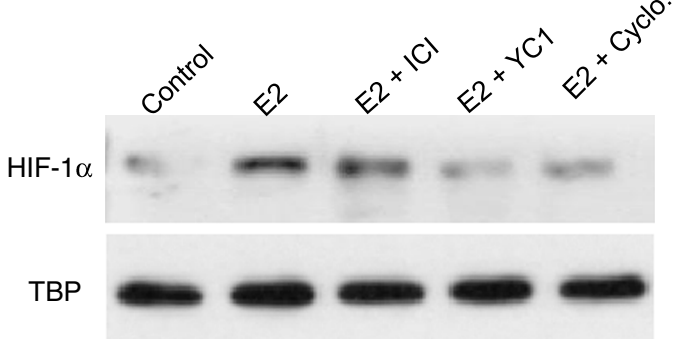**B**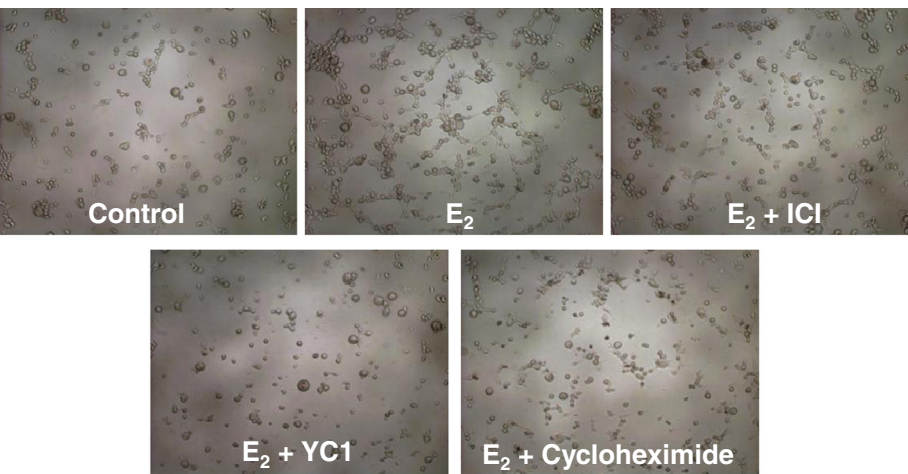**C**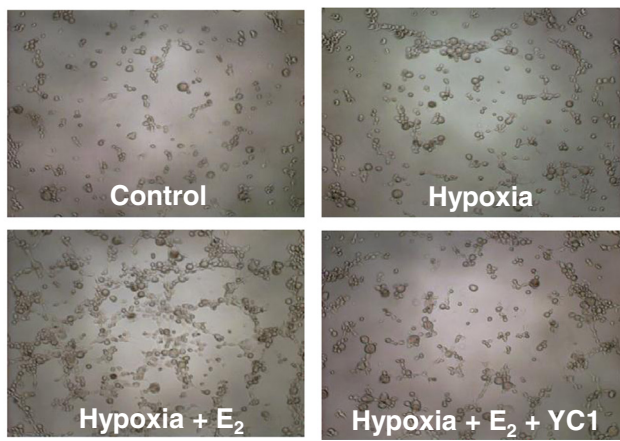

Supplement: MOESM6 [file 9552212]
